# Supplementary material for: Profile of Lipoprotein Subclasses in Chinese Primary Open-Angle Glaucoma Patients
Source: MDPI journal article supplement (doi:10.3390/ijms25084544), 2024-04-21
Supplement: s1 [file s1]

# Profile of Lipoprotein Subclasses in Chinese Primary Open-Angle Glaucoma Patients

Changzhen Fu <sup>1</sup>, Jianming Xu <sup>1</sup>, Shao-Lang Chen <sup>1</sup>, Chong-Bo Chen <sup>1</sup>, Jia-Jian Liang <sup>1</sup>, Zibo Liu <sup>1</sup>, Chukai Huang <sup>1</sup>, Zhenggen Wu <sup>1</sup>, Tsz Kin Ng <sup>1,2</sup>, Mingzhi Zhang <sup>1,\*</sup> and Qingping Liu <sup>1,\*</sup>

- <sup>1</sup> Joint Shantou International Eye Center of Shantou University and The Chinese University of Hong Kong, Shantou 515041, China; fcz@jsiec.org (C.F.); xjm@jsiec.org (J.X.); csl@jsiec.org (S.-L.C.); ccb@jsiec.org (C.-B.C.); lj@jsiec.org (J.-J.L.); liuzibo0910@gmail.com (Z.L.); hck@jsiec.org (C.H.); wzg@jsiec.org (Z.W.); micntk@hotmail.com (T.K.N.)  
<sup>2</sup> Department of Ophthalmology and Visual Sciences, The Chinese University of Hong Kong, Hong Kong, China  
 \* Correspondence: zmz@jsiec.org (M.Z.); qingpingliu40@126.com (Q.L.)

Table S1. Lipid profiles in primary open-angle glaucoma patients

| Variables      | POAG (n = 20)                 |                          |                     | controls (n = 20)             |                          |                     |
|----------------|-------------------------------|--------------------------|---------------------|-------------------------------|--------------------------|---------------------|
|                | with elevated TC and/or LDL-C | with normal TC and LDL-C | p Value             | with elevated TC and/or LDL-C | with normal TC and LDL-C | p Value             |
|                | (n = 10)                      | (n = 10)                 |                     | (n = 10)                      | (n = 10)                 |                     |
| TC (mmol/L)    | 6.31±0.88                     | 4.58±0.42                | <0.001 <sup>c</sup> | 5.30±0.40                     | 4.16±0.67                | <0.001 <sup>c</sup> |
| LDL-C (mmol/L) | 4.26±0.90                     | 2.66±0.46                | <0.001 <sup>c</sup> | 3.53±0.36                     | 2.50±0.53                | <0.001 <sup>a</sup> |
| HDL-C (mmol/L) | 1.39±0.33                     | 1.37±0.25                | 0.909 <sup>a</sup>  | 1.46±0.43                     | 1.28±0.34                | 0.309 <sup>a</sup>  |
| TG (mmol/L)    | 2.08±0.89                     | 1.39±0.64                | 0.065 <sup>a</sup>  | 1.61±0.74                     | 1.07±0.14                | 0.046 <sup>c</sup>  |
| oxLDL (U/L)    | 62.53±14.31                   | 49.03±12.32              | 0.036 <sup>a</sup>  | 50.05±9.22                    | 46.89±9.79               | 0.480 <sup>a</sup>  |
| Lpα (mg/L)     | 133.90±93.34                  | 141.20±127.4             | 0.885 <sup>a</sup>  | 181.70±145.34                 | 95.30±86.28              | 0.190 <sup>d</sup>  |
| ApoB (g/L)     | 1.10±0.22                     | 0.75±0.16                | 0.001 <sup>a</sup>  | 0.95±0.13                     | 0.75±0.09                | 0.001 <sup>a</sup>  |
| ApoAI (g/L)    | 1.38±0.30                     | 1.24±0.10                | 0.185 <sup>d</sup>  | 1.31±0.20                     | 1.20±0.23                | 0.242 <sup>a</sup>  |
| ApoB/AI        | 0.82±0.16                     | 0.61±0.13                | 0.006 <sup>a</sup>  | 0.74±0.17                     | 0.65±0.16                | 0.261 <sup>a</sup>  |
| IDL (mg/dL)    | 48.41±26.34                   | 28.53±10.22              | 0.047 <sup>c</sup>  | 43.50±11.76                   | 24.65±12.91              | 0.003 <sup>a</sup>  |
| IDL-A (mg/dL)  | 10.00±4.09                    | 9.27±5.25                | 0.393 <sup>d</sup>  | 10.57±4.70                    | 7.06±3.20                | 0.067 <sup>a</sup>  |
| IDL-B (mg/dL)  | 4.77±4.35                     | 2.75±2.74                | 0.231 <sup>a</sup>  | 5.76±4.04                     | 1.95±2.18                | 0.007 <sup>d</sup>  |
| IDL-C (mg/dL)  | 33.64±22.93                   | 16.51±9.32               | 0.049 <sup>c</sup>  | 27.18±7.97                    | 10.46±3.31               | 0.013 <sup>a</sup>  |
| LDL1 (mg/dL)   | 53.14±23.95                   | 37.49±10.92              | 0.076 <sup>a</sup>  | 39.76±13.68                   | 36.80±11.31              | 0.604 <sup>a</sup>  |
| LDL2 (mg/dL)   | 30.87±16.49                   | 20.65±7.37               | 0.098 <sup>c</sup>  | 31.94± 15.01                  | 22.89±9.98               | 0.130 <sup>a</sup>  |
| LDL3 (mg/dL)   | 29.43±7.59                    | 15.65±9.90               | 0.003 <sup>d</sup>  | 19.36±10.49                   | 10.93±4.55               | 0.043 <sup>d</sup>  |
| sdLDL (mg/dL)  | 32.08±6.69                    | 16.17±10.69              | 0.001 <sup>d</sup>  | 21.36±12.31                   | 12.36±5.10               | 0.054 <sup>c</sup>  |
| L-HDL (mg/dL)  | 11.40±9.03                    | 10.35±6.48               | 0.768 <sup>a</sup>  | 10.81±8.09                    | 9.15± 6.78               | 0.436 <sup>d</sup>  |
| I-HDL (mg/dL)  | 21.11±7.75                    | 21.76±5.75               | 0.835 <sup>a</sup>  | 23.44±9.66                    | 20.94±7.40               | 0.524 <sup>a</sup>  |
| S-HDL (mg/dL)  | 21.07±8.51                    | 20.90±5.78               | 0.959 <sup>a</sup>  | 22.04±4.86                    | 19.20±3.75               | 0.162 <sup>a</sup>  |
| VLDL (mg/dL)   | 51.00±9.56                    | 35.5±4.97                | <0.001 <sup>a</sup> | 47.80±5.83                    | 33.6±6.85                | <0.001 <sup>a</sup> |
| non-HDL        | 4.92±0.67                     | 3.21±0.57                | <0.001 <sup>a</sup> | 3.85±0.44                     | 2.88±0.52                | <0.001 <sup>a</sup> |
| TC/HDL-C ratio | 181.13±29.40                  | 133.44±29.81             | 0.002 <sup>a</sup>  | 150.42±38.81                  | 135.95±40.64             | 0.218 <sup>d</sup>  |
| oxLDL/HDL-C    | 46.67±13.04                   | 37.86±15.71              | 0.189 <sup>a</sup>  | 38.72±19.16                   | 39.53±15.75              | 0.921 <sup>a</sup>  |
| oxLDL/LDL-C    | 14.95±3.04                    | 18.47±3.21               | 0.021 <sup>a</sup>  | 14.38±2.08                    | 18.96±2.72               | 0.001 <sup>a</sup>  |

|                |           |            |                    |           |            |                    |
|----------------|-----------|------------|--------------------|-----------|------------|--------------------|
| oxLDL/TC ratio | 9.93±1.90 | 10.70±2.37 | 0.436 <sup>a</sup> | 9.60±2.03 | 11.02±1.40 | 0.092 <sup>a</sup> |
|----------------|-----------|------------|--------------------|-----------|------------|--------------------|

TC, total cholesterol; TG, triglyceride; LDL-C, low-density lipoprotein cholesterol; HDL-C, high density lipoprotein cholesterol; Lpα, lipoprotein α; ApoB, apolipoprotein B; ApoAI, apolipoprotein AI; oxLDL, oxidized LDL; IDL, intermediate-density lipoprotein; sdLDL, small density lipoprotein; L-HDL, large HDL; I-HDL, intermediate HDL; S-HDL, small HDL; VLDL, very low-density lipoprotein; non-HDL, non-high-density lipoprotein cholesterol.

<sup>a</sup>Student *t* test, <sup>c</sup>Welch *t* tests; <sup>d</sup>Wilcoxon rank sum test.

Data are presented as mean ±SD.

Note: LDL4 was detected in 5, 4, 3, and 4 cases in POAG and control subjects in both elevated and normal TC and LDL-C level participants, respectively, while LDL5-LDL7 were not detected.
